# Supplementary material
Source: publisher figshare collection journal article supplement (https://tandf.figshare.com/articles/dataset/_/8478902)
Supplement: Supplementary file 1 [file 2]

Archive with 6 entries (6 files):
- HSEM_16201089_Supplement.docx
- Supplemental Figure 1S - revised.pdf
- Supplemental Figure 2S.pdf
- Supplemental Figure 3S.pdf
- Supplemental Figure 4S.pdf
- Supplemental Figure 5S.pdf
