# Supplementary material
Source: publisher figshare collection journal article supplement (https://tandf.figshare.com/articles/dataset/_/8478902)
Supplement: Supplementary file 1 [file 2 › HSEM_16201089_Supplement.docx]

Supplement

Based on the level-specific chi-square value, number of parameters, and sample size, one can compute additional indices of model fit. For example, the Bayesian Information Criteria (BIC) weights the number of parameters by the log of the sample size:

where , *kq*, and *Nq* refer, respectively, to the chi-square statistic, number of parameters in the specified model, and sample size at a given level of analysis.

Supplemental Table 1S. Bayesian Information Criteria for Correctly and Incorrectly Specified 1-Factor Multilevel Structural Equation Models using the MSEM framework

| Model | Level | *BIC – M (SD)* |
| --- | --- | --- |
| CW, CB | 1 | 719.06 (7.03) |
| 2 | 300.19 (7.44) |
| WW, CB | 1 | 77773.39 (326.24) |
| 2 | 300.26 (7.49) |
| CW, WB | 1 | 719.21 (6.95) |
| 2 | 1778.15 (28.94) |

Note. M = mean, SD = standard deviation over 500 trials; CW indicates correct within model; CB indicates correct between model; WW indicates wrong within model; WB indicates wrong between model; MSEM indicates multilevel structural equation modeling (e.g., Goldstein & McDonald, 1988; Muthén, 1990, 1994). Because of suspiciously high outlier χ2 values, 4 trials of the CW, CB model under the MSEM approach, 1 trial of the CW, WB model under the MSEM approach, and 1 trial of the CW, CB under the ML-SEM approach were removed.
