# Supplementary material
Source: publisher figshare collection journal article supplement (https://tandf.figshare.com/articles/dataset/_/8478902)

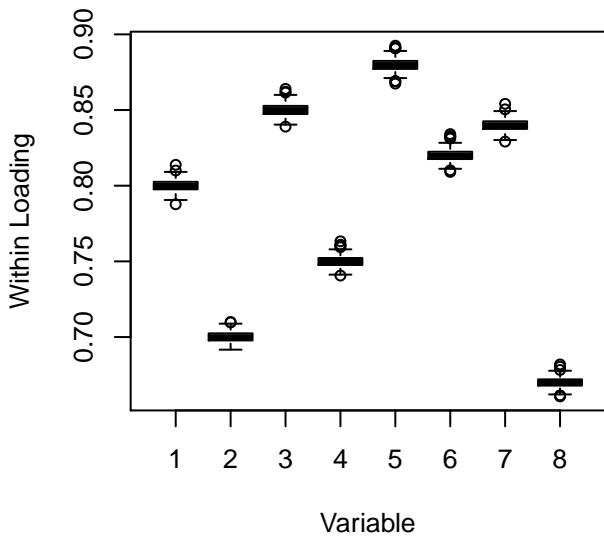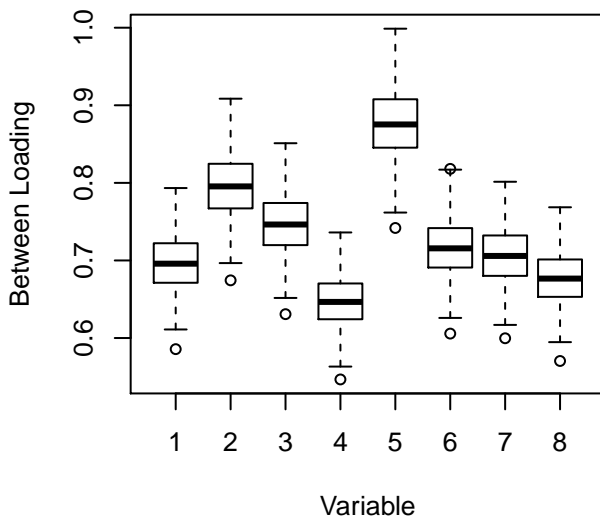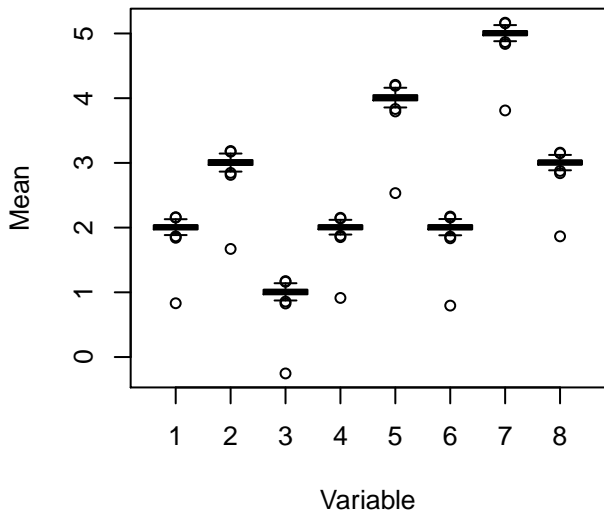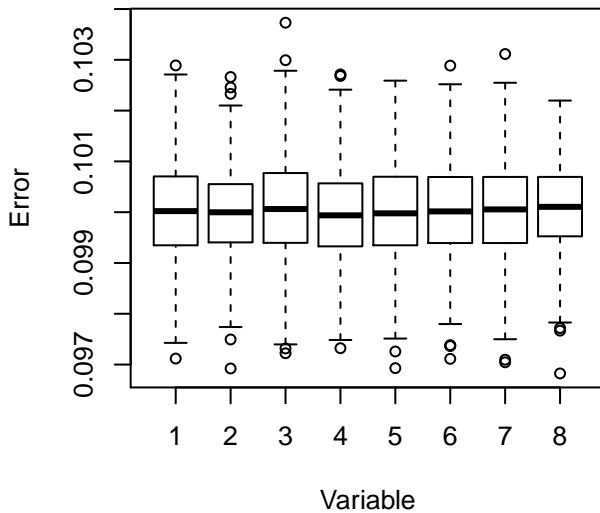

Supplement: Supplementary file 1 [file 2 › Supplemental Figure 1S - revised.pdf]

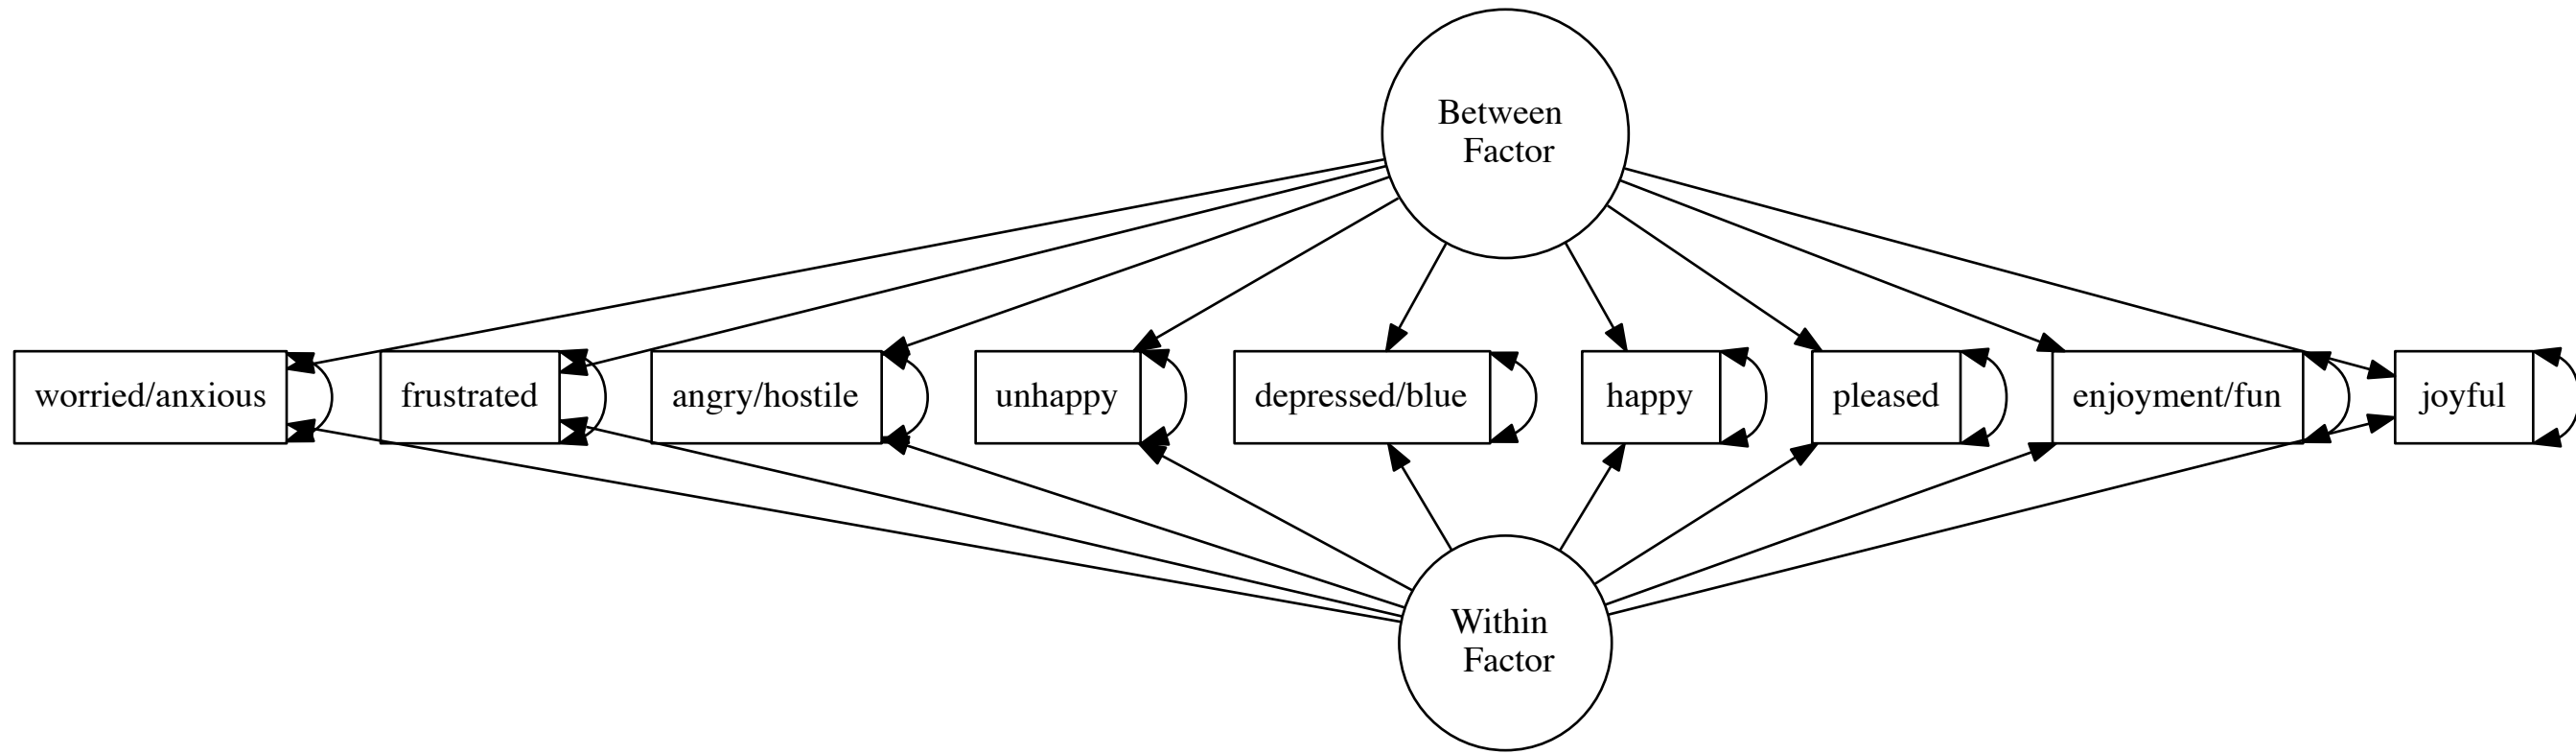

Supplement: Supplementary file 1 [file 2 › Supplemental Figure 2S.pdf]

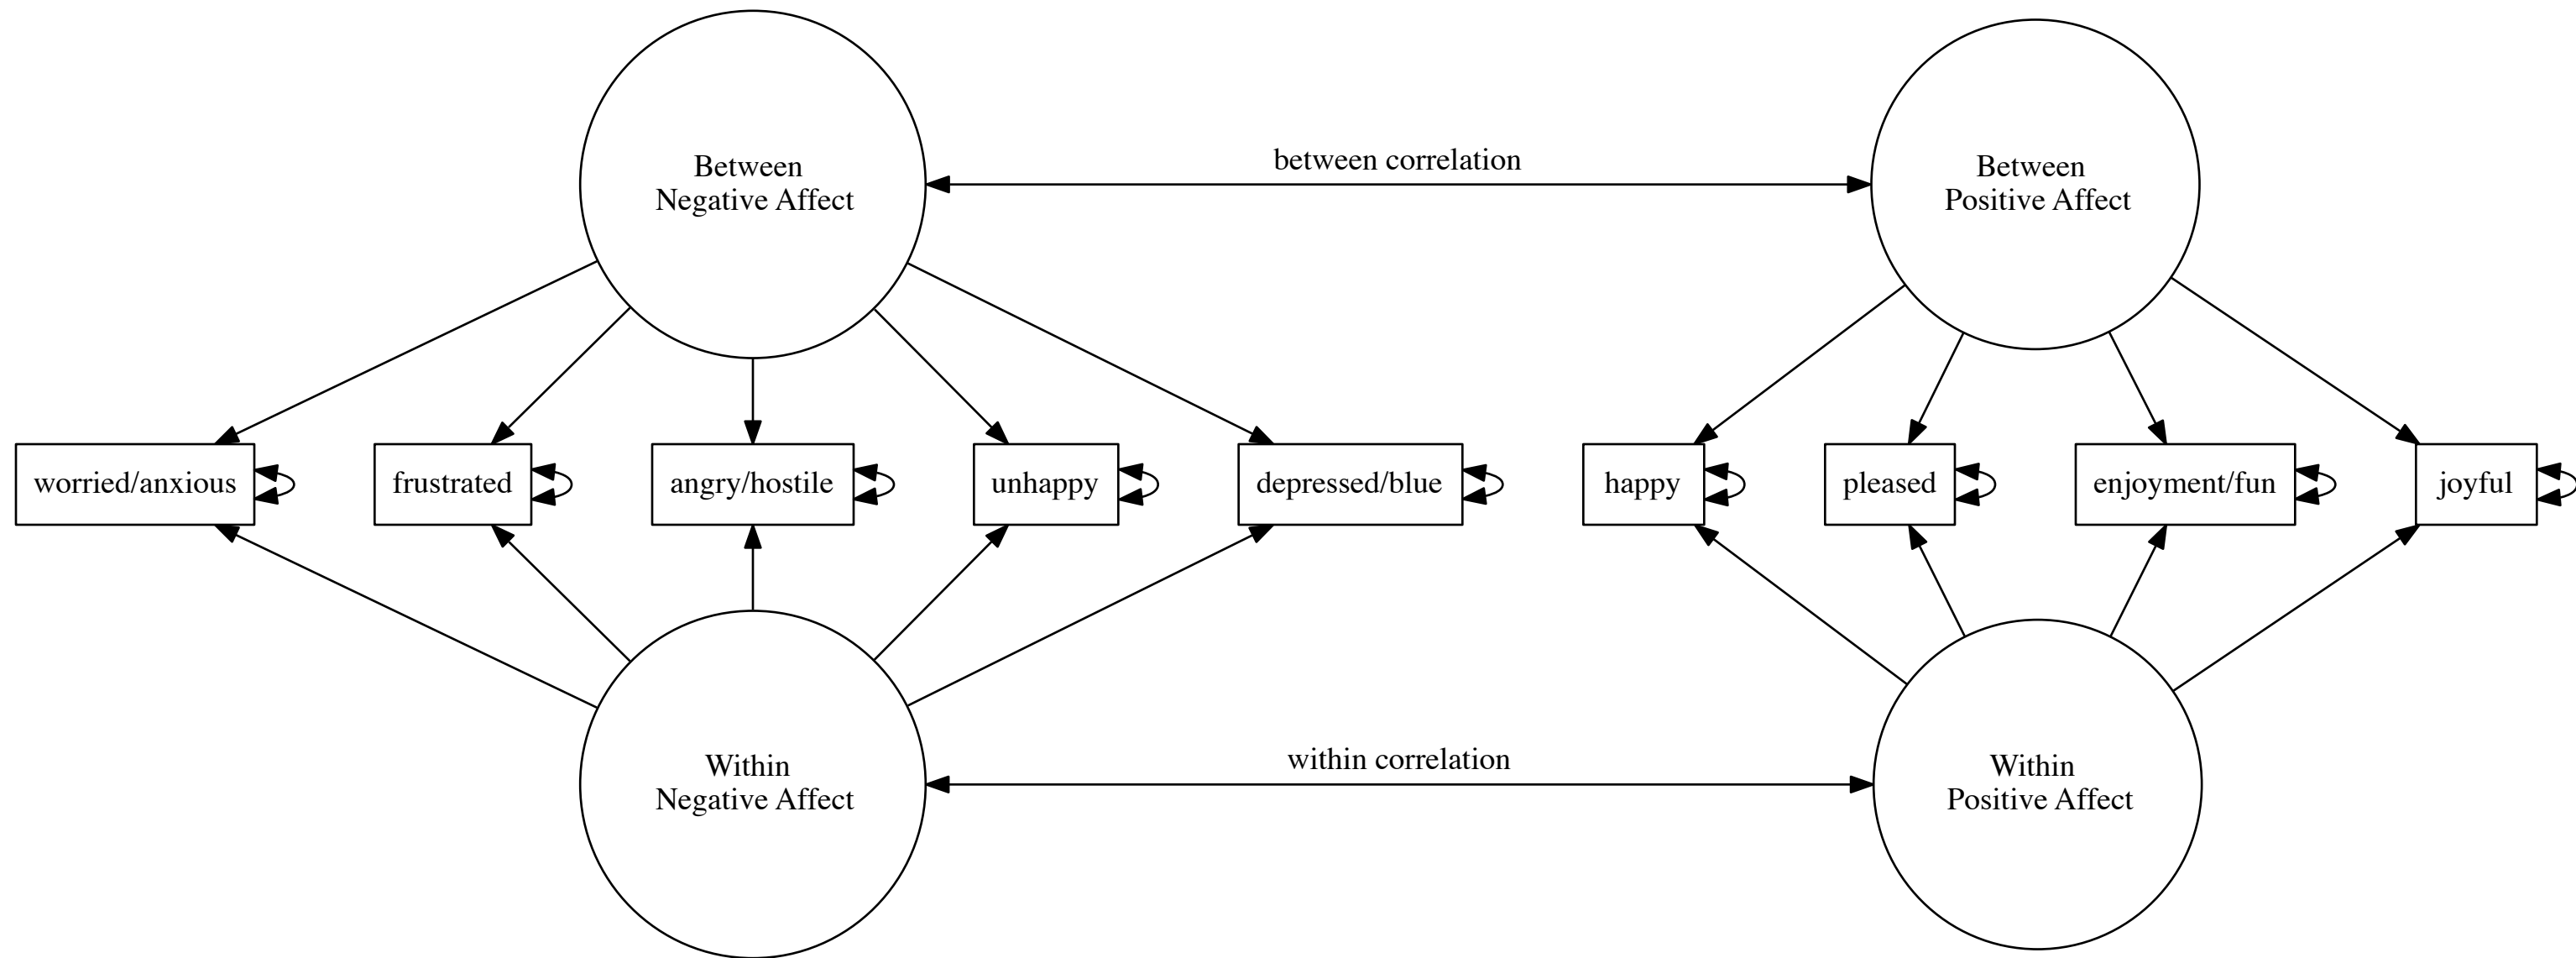

Supplement: Supplementary file 1 [file 2 › Supplemental Figure 3S.pdf]

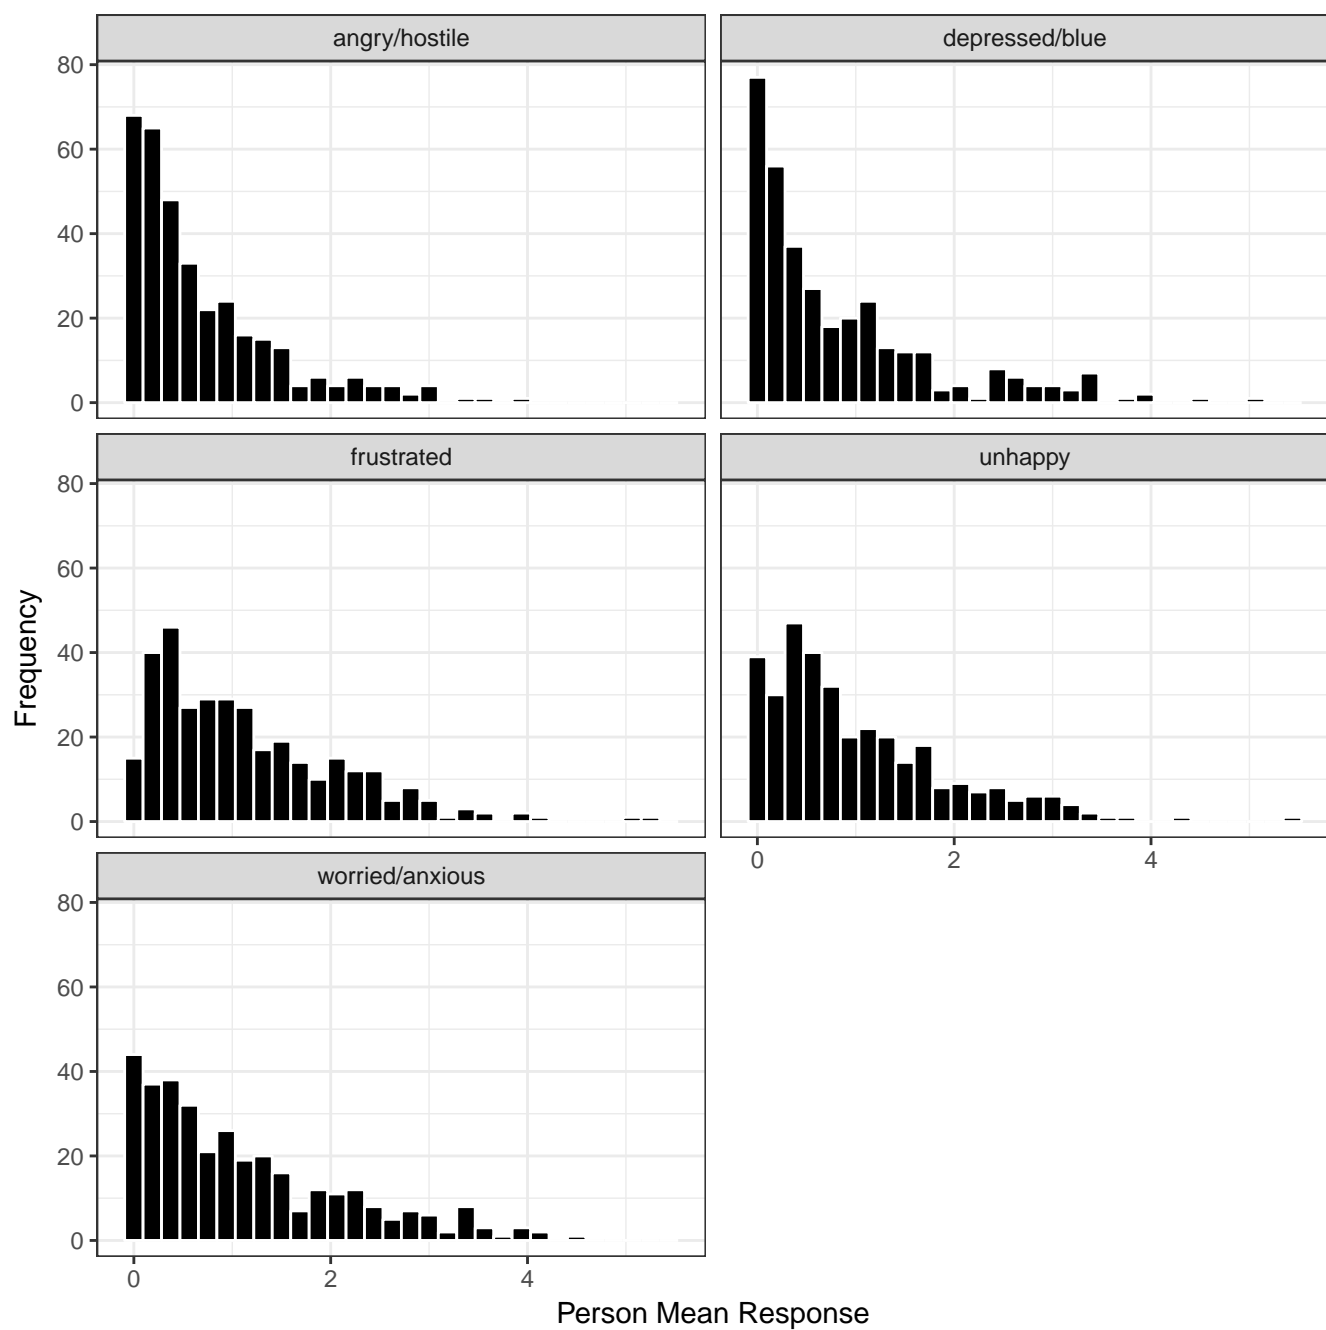

Supplement: Supplementary file 1 [file 2 › Supplemental Figure 4S.pdf]

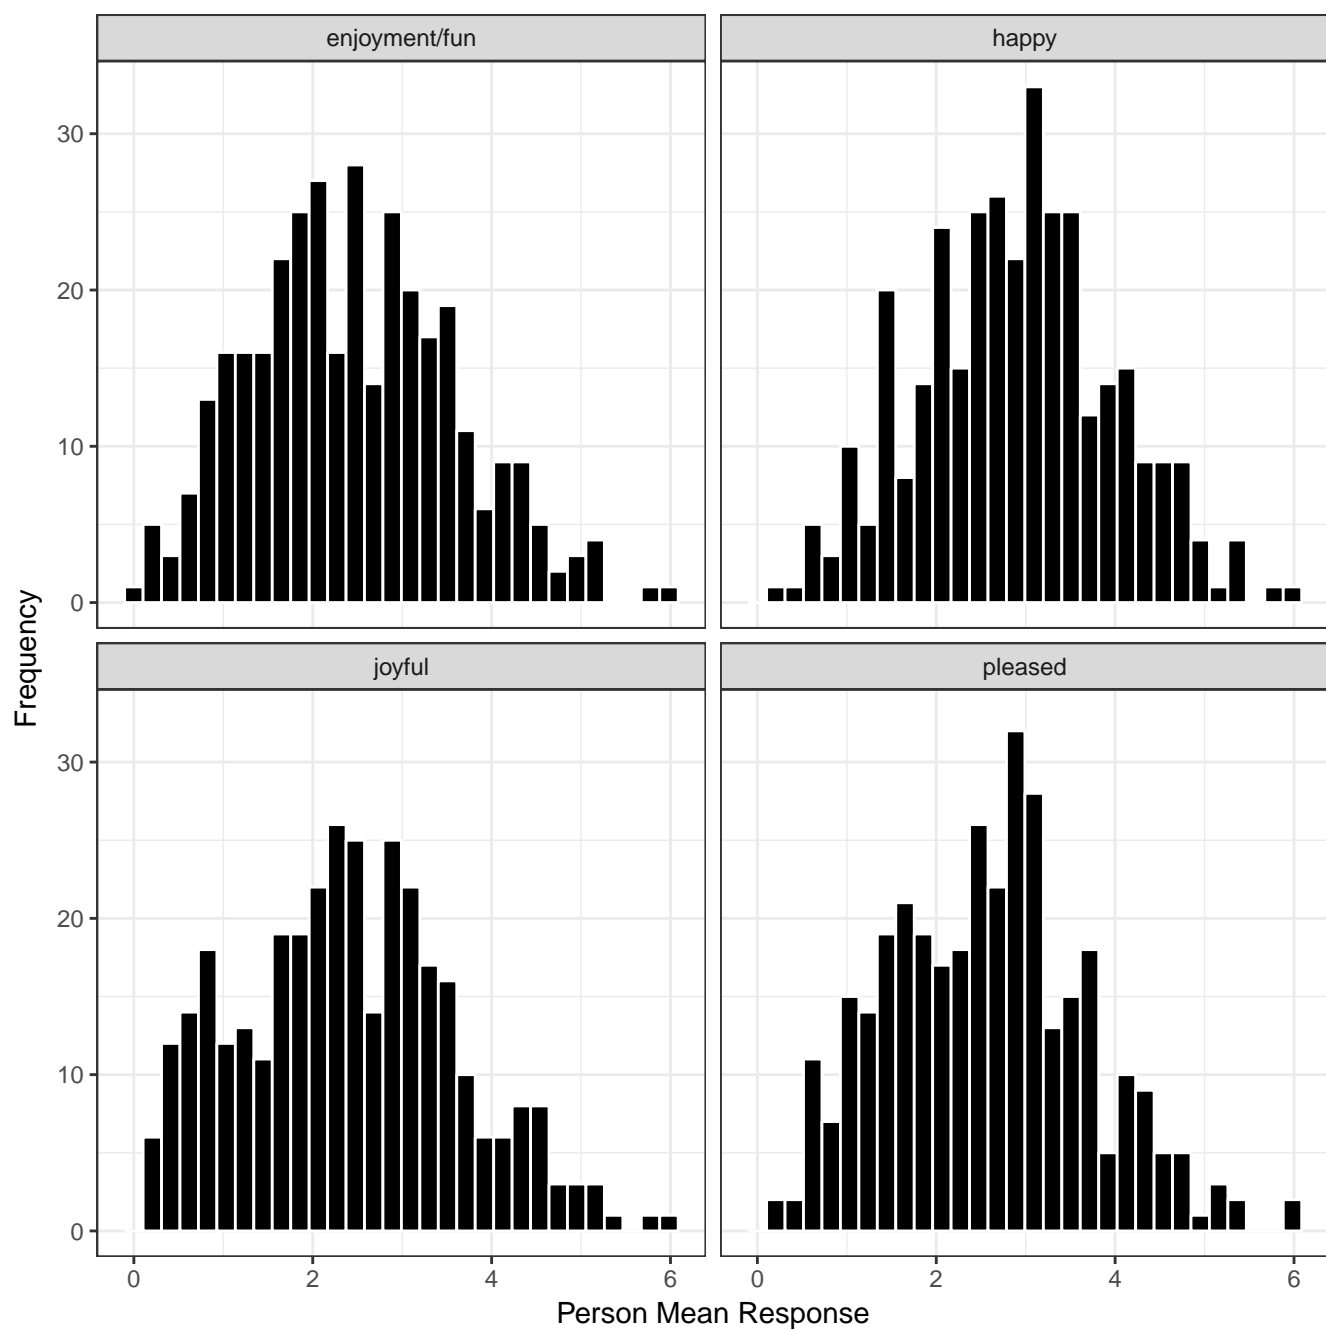

Supplement: Supplementary file 1 [file 2 › Supplemental Figure 5S.pdf]
